# Supplementary material
Source: Springer Nature journal article supplement (https://www.springermedizin.de/resource/supplementary/12986_2009_253_MOESM1_ESM.pdf/25655688)
Supplement: MOESM1 [file 25655688]

**Magnetic  
Resonance  
Imaging**

**Body  
Composition**

**Dual x-ray Absorptiometry**

|                                          |                      |                                    |                                               |
|------------------------------------------|----------------------|------------------------------------|-----------------------------------------------|
| <b>Adipose<br/>Tissue</b>                | <b>Fat Mass</b>      | <b>Fat Mass</b>                    | <b>Fat Mass</b>                               |
| <b>Skeletal<br/>Muscle Mass</b>          | <b>Fat-Free Mass</b> | <b>Non-Bone Lean<br/>Body Mass</b> | <b>Estimated<br/>Skeletal<br/>Muscle Mass</b> |
| <b>Organ &amp; Other<br/>Soft Tissue</b> |                      |                                    | <b>Organ &amp; Other<br/>Soft Tissue</b>      |
| <b>Other</b>                             |                      | <b>Bone Mineral<br/>Content</b>    | <b>Bone Mineral<br/>Content</b>               |
